# Supplementary material
Source: publisher figshare collection journal article supplement (https://acs.figshare.com/ndownloader/files/4136341)
Supplement: Supplementary file 1 [file 4136341]

# Unusual compressional behavior of lithium-manganese oxides: A case study of $\text{Li}_4\text{Mn}_5\text{O}_{12}$

*Jolanta Darul\*, Waldemar Nowicki and Paweł Piszora*

Department of Materials Chemistry, Faculty of Chemistry, Adam Mickiewicz University,  
Grunwaldzka 6, 60-780 Poznań, Poland

\*Corresponding Author: Phone: +48 61 8291236; E-mail: [jola@amu.edu.pl](mailto:jola@amu.edu.pl) (J. Darul)

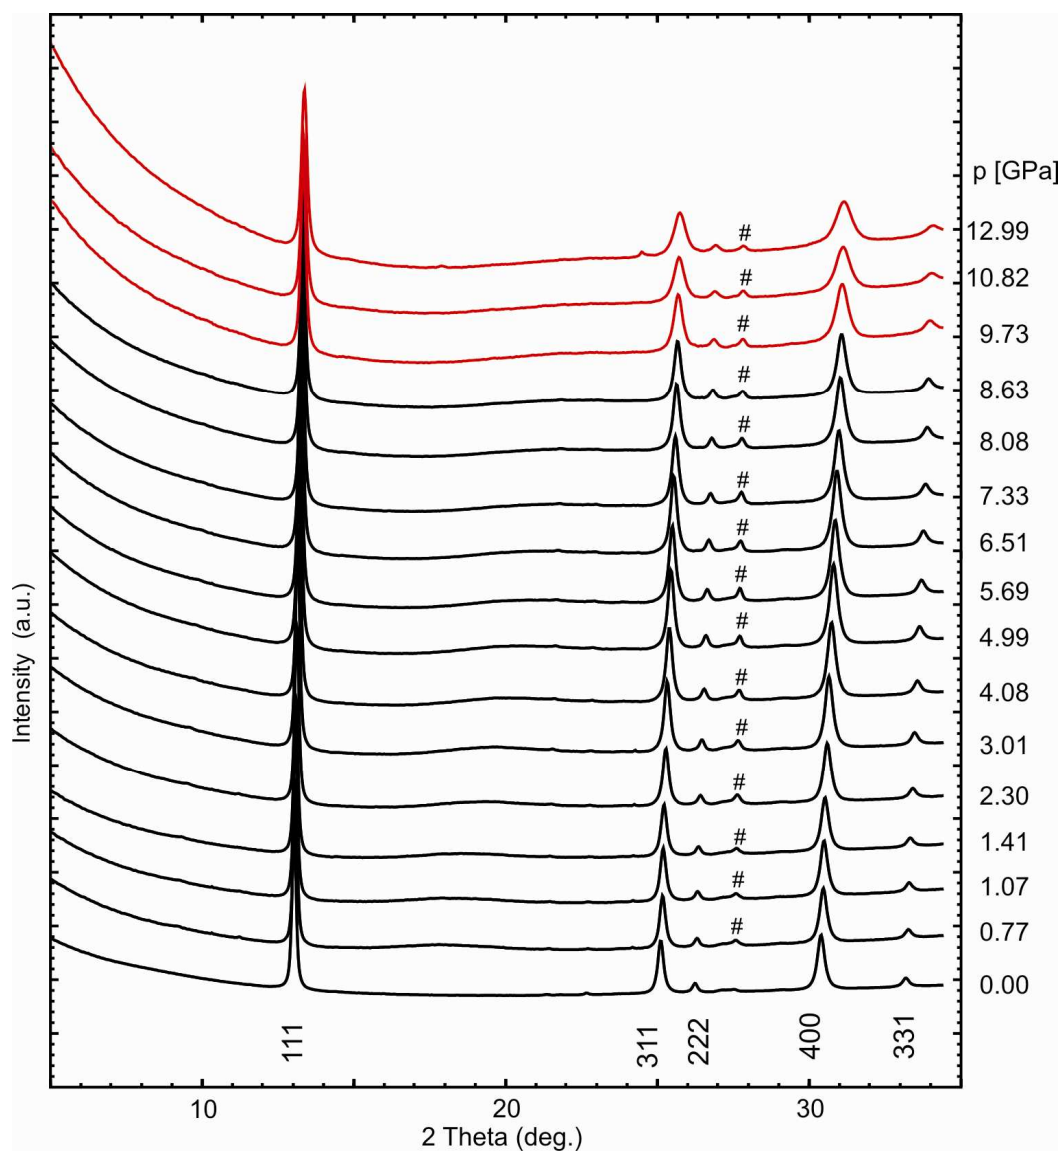

**Figure S1.** Evolution of the X-ray diffraction patterns of  $\text{Li}_4\text{Mn}_5\text{O}_{12}$  powder in a mixture of methanol–ethanol as a function of pressure up to  $\sim 13$  GPa. Systematic shifts toward higher  $2\theta$  (smaller d-spacing) were observed at pressures below 8.63 GPa due to the compression of the cubic lattice. Patterns in red are obtained under nonhydrostatic compression. # represents the peak from the tungsten gasket. Miller indices for the spinel cubic phase are given at the bottom.

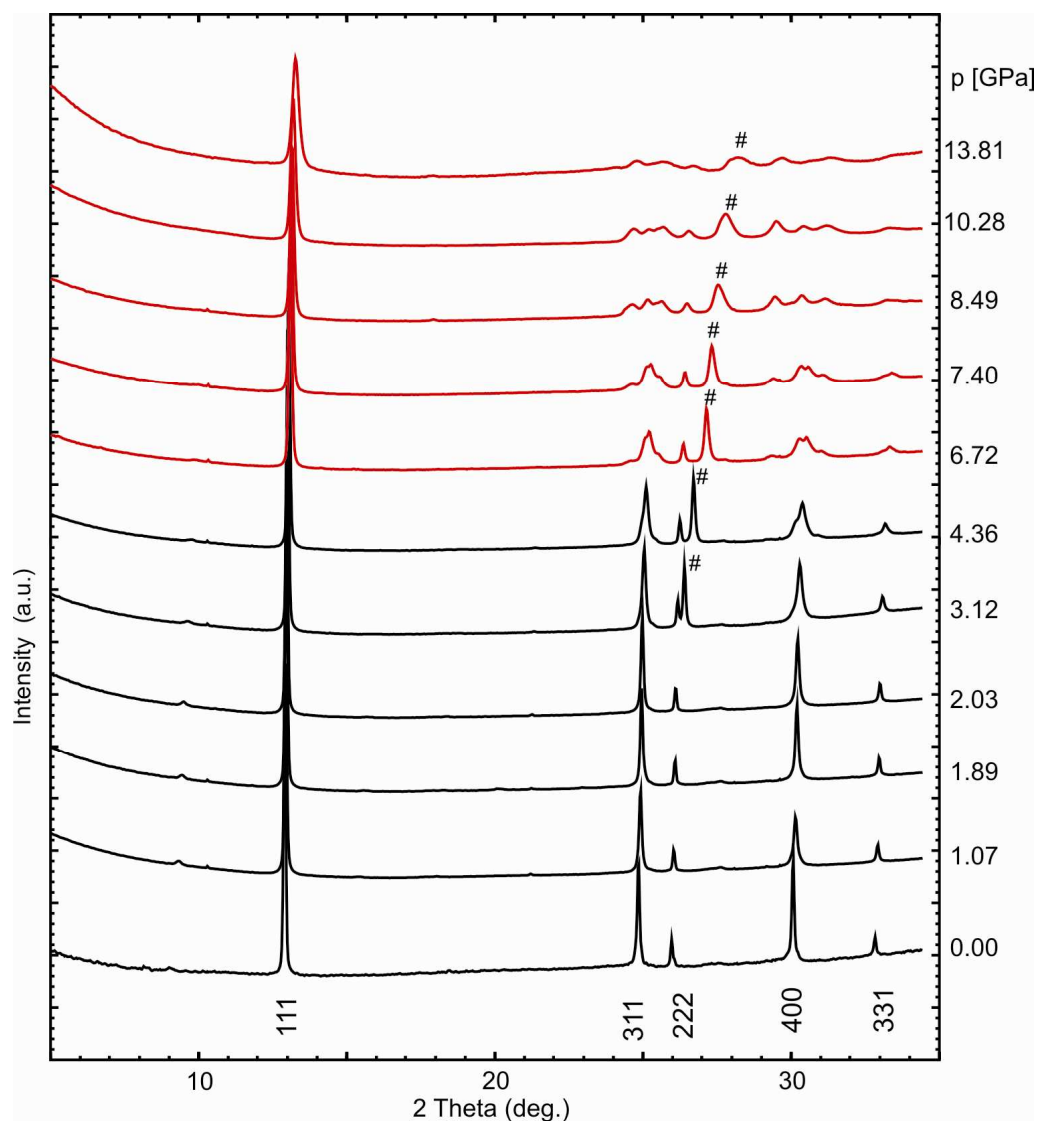

**Figure S2.** Evolution of the X-ray diffraction patterns of  $\text{LiMn}_2\text{O}_4$  powder in a mixture of methanol–ethanol as a function of pressure up to  $\sim 13.8$  GPa. Systematic shifts toward higher  $2\theta$  (smaller d-spacing) were observed at pressures below 4.36 GPa due to the compression of the cubic lattice. Patterns in red are obtained under nonhydrostatic compression. # represents the peak from the tungsten gasket. Miller indices for the spinel cubic phase are given at the bottom.

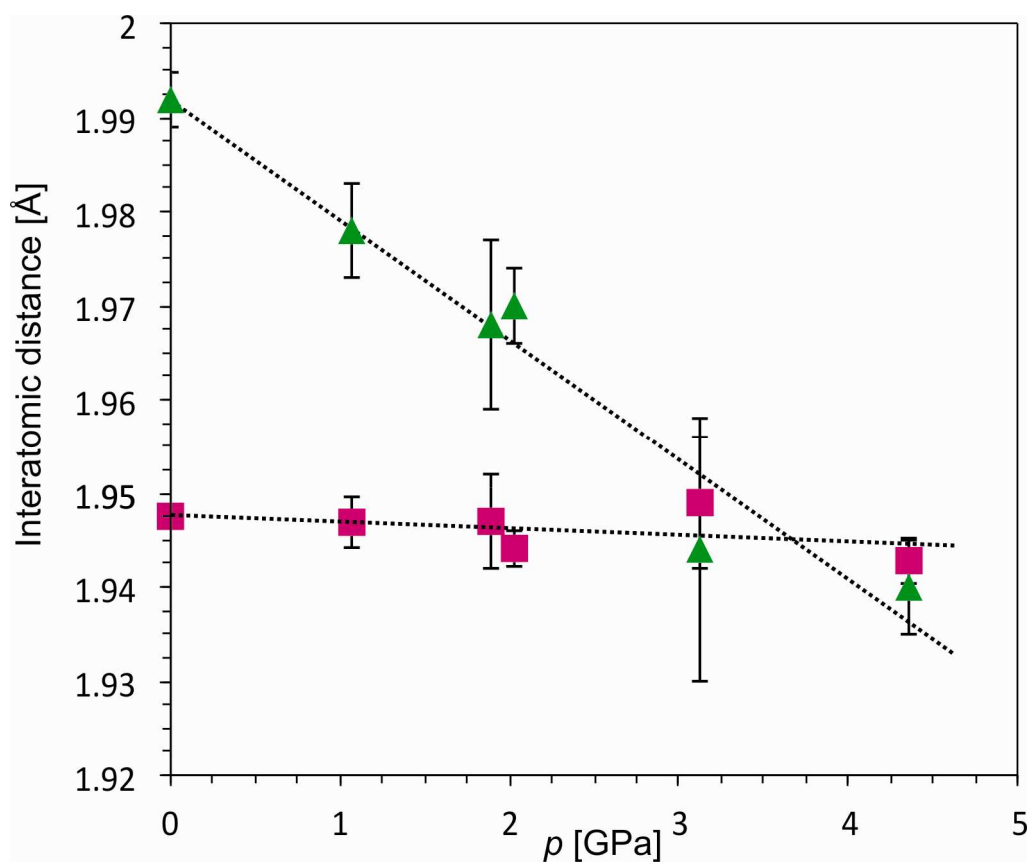

**Figure S3.** Interatomic distances in  $\text{LiMn}_2\text{O}_4$  as a function of pressure; square -  $(\text{Mn,Li})\text{O}_6$  octahedra, triangle -  $\text{LiO}_4$  tetrahedra.

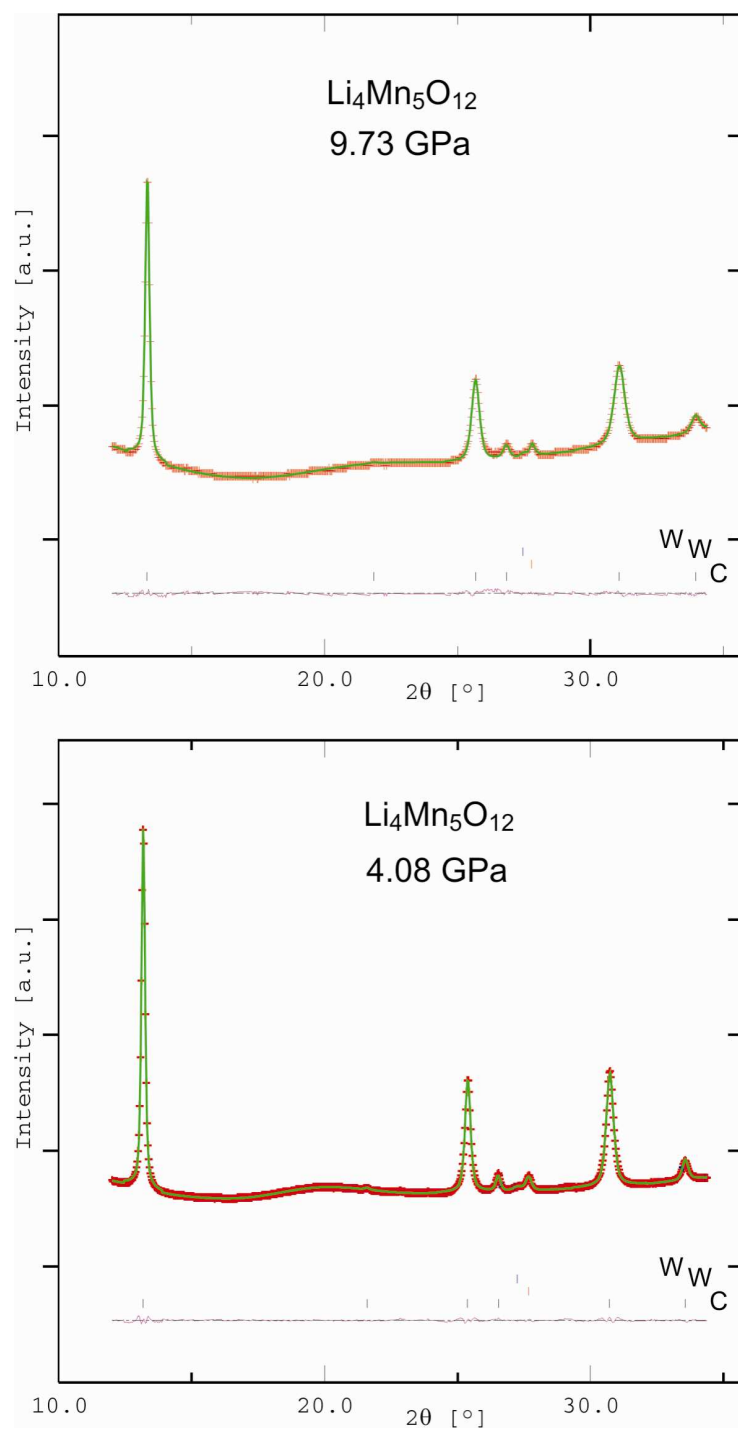

**Figure S4.** Structure refinement of  $\text{Li}_4\text{Mn}_5\text{O}_{12}$  spinel ( $Fd3m$ , Nr. 227;  $Z = 8$ ; pressure 4.08 GPa:  $a = 8.05873$  (9) Å,  $u = 0.26154$ (9); pressure 9.73 GPa:  $a = 7.9707$  (6) Å,  $u = 0.2606$ (1)) showing observed (red crosses) and calculated (green solid line) intensities. Tick marks refer to  $\text{Li}_4\text{Mn}_5\text{O}_{12}$  – C and tungsten gasket – W.



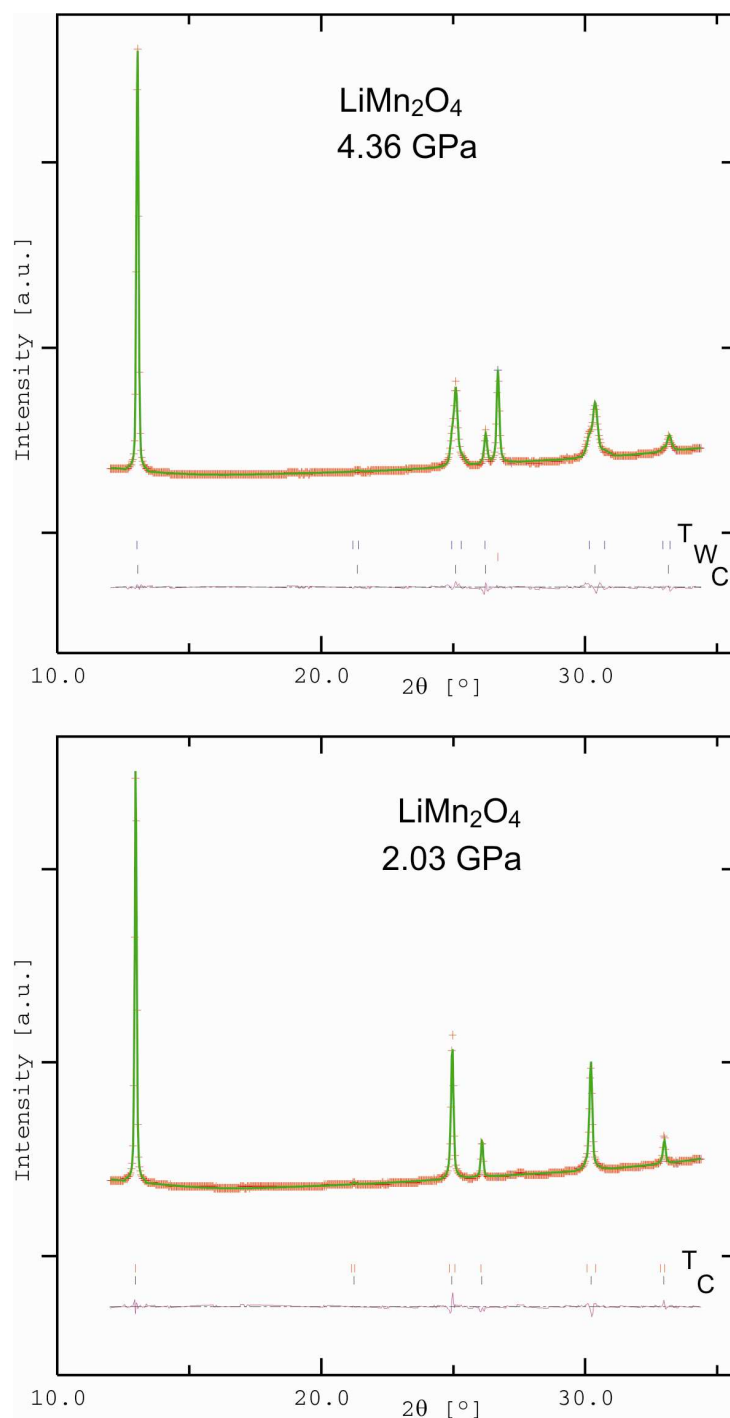

**Figure S5.** Structure refinement of  $\text{LiMn}_2\text{O}_4$  spinel showing observed (red crosses) and calculated (green solid line) intensities. Tick marks refer to  $\text{LiMn}_2\text{O}_4 - \text{C}$  ( $Fd3m$ , Nr. 227; pressure 2.03 GPa:  $a = 8.1992(2)$  Å,  $u = 0.2636(3)$ ; pressure 4.36 GPa:  $a = 8.1544(3)$  Å,  $u = 0$ ).

2624(3)), – T ( $I4_1/amd$ , Nr. 141; pressure 4.36 GPa:  $a = 5.8078(6)$  Å,  $c = 8.060(2)$ ) and tungsten gasket – W.
